# Supplementary material for: Simvastatin Modulates Mesenchymal Stromal Cell Proliferation and Gene Expression
Source: PubMed Central journal article supplement (PMC4395223; doi:10.1371/journal.pone.0120137), 2015-04-13
Supplement: pone.0120137.s001.pdf [file pone.0120137.s001.pdf]

| Gene Symbol | Fold change S_1uM vs Control | Description                                                                               |
|-------------|------------------------------|-------------------------------------------------------------------------------------------|
| HS3ST1      | 10.1                         | heparan sulfate (glucosamine) 3-O-sulfotransferase 1                                      |
| GJB2        | 9.1                          | gap junction protein, beta 2, 26kDa                                                       |
| KCNN4       | 7.8                          | potassium intermediate/small conductance calcium-activated channel, subfamily N, member 4 |
| KLF4        | 7.1                          | Kruppel-like factor 4 (gut)                                                               |
| MALL        | 7.1                          | mal, T-cell differentiation protein-like                                                  |
| CRABP2      | 6.9                          | cellular retinoic acid binding protein 2                                                  |
| CMKLR1      | 5.2                          | chemokine-like receptor 1                                                                 |
| GAP43       | 5.2                          | growth associated protein 43                                                              |
| NGEF        | 5.1                          | neuronal guanine nucleotide exchange factor                                               |
| TNXB        | 5.0                          | tenascin XB                                                                               |
| RAB27B      | 5.0                          | RAB27B, member RAS oncogene family                                                        |
| AKR1B10     | 4.8                          | aldo-keto reductase family 1, member B10 (aldose reductase)                               |
| HYAL1       | 4.6                          | hyaluronoglucosaminidase 1                                                                |
| TMEM26      | 4.5                          | transmembrane protein 26                                                                  |
| DDIT4       | 4.4                          | DNA-damage-inducible transcript 4                                                         |
| PMCH        | 4.3                          | pro-melanin-concentrating hormone                                                         |

|           |     |                                                                  |
|-----------|-----|------------------------------------------------------------------|
| PLCD4     | 4.3 | phospholipase C, delta 4                                         |
| PMCHL1    | 4.2 | pro-melanin-concentrating hormone-like 1, pseudogene             |
| OLFML2A   | 4.2 | olfactomedin-like 2A                                             |
| PTGER1    | 4.2 | prostaglandin E receptor 1 (subtype EP1)                         |
| MIAT      | 4.2 | myocardial infarction associated transcript (non-protein coding) |
| AKR1B10P1 | 4.2 | aldo-keto reductase family 1, member B10 pseudogene 1            |
| AKR1C1    | 4.2 | aldo-keto reductase family 1, member C1                          |
| THBD      | 4.1 | thrombomodulin                                                   |
| ANKDD1A   | 4.0 | ankyrin repeat and death domain containing 1A                    |
