# Supplementary material for: Simvastatin Modulates Mesenchymal Stromal Cell Proliferation and Gene Expression
Source: PubMed Central journal article supplement (PMC4395223; doi:10.1371/journal.pone.0120137), 2015-04-13
Supplement: pone.0120137.s002.pdf [file pone.0120137.s002.pdf]

| Gene Symbol | Fold change S_1uM vs Control | Description                                          |
|-------------|------------------------------|------------------------------------------------------|
| WWC1        | -5.1                         | WW and C2 domain containing 1                        |
| ATAD5       | -4.5                         | ATPase family, AAA domain containing 5               |
| VRTN        | -4.4                         | vertebrae development associated                     |
| KALRN       | -4.4                         | kalirin, RhoGEF kinase                               |
| CCNE2       | -4.2                         | cyclin E2                                            |
| NEB         | -4.2                         | nebulin                                              |
| C12orf54    | -4.1                         | chromosome 12 open reading frame 54                  |
| MCM10       | -4.1                         | minichromosome maintenance complex component 10      |
| ANKRD1      | -4.1                         | ankyrin repeat domain 1 (cardiac muscle)             |
| FAM111B     | -4.0                         | family with sequence similarity 111, member B        |
| IL7R        | -3.9                         | interleukin 7 receptor                               |
| IGHD        | -3.8                         | immunoglobulin heavy constant delta                  |
| E2F8        | -3.8                         | E2F transcription factor 8                           |
| AOC2        | -3.8                         | amine oxidase, copper containing 2 (retina-specific) |
| EVI2A       | -3.8                         | ecotropic viral integration site 2a                  |
| E2F2        | -3.8                         | E2F transcription factor 2                           |

|           |      |                                                                                   |
|-----------|------|-----------------------------------------------------------------------------------|
| VAV1      | -3.7 | vav 1 guanine nucleotide exchange factor                                          |
| ADARB1    | -3.7 | adenosine deaminase, RNA-specific, B1                                             |
| CD274     | -3.7 | CD274 molecule                                                                    |
| DMC1      | -3.6 | DMC1 dosage suppressor of mck1 homolog, meiosis-specific homologous recombination |
| BIRC3     | -3.5 | baculoviral IAP repeat containing 3                                               |
| ZNF367    | -3.5 | zinc finger protein 367                                                           |
| KLHL23    | -3.5 | kelch-like family member 23                                                       |
| ARHGAP11A | -3.5 | Rho GTPase activating protein 11A                                                 |
| PPARGC1B  | -3.5 | peroxisome proliferator-activated receptor gamma, coactivator 1 beta              |
| GDF6      | -3.4 | growth differentiation factor 6                                                   |
