# Supplementary material for: Simvastatin Modulates Mesenchymal Stromal Cell Proliferation and Gene Expression
Source: PubMed Central journal article supplement (PMC4395223; doi:10.1371/journal.pone.0120137), 2015-04-13

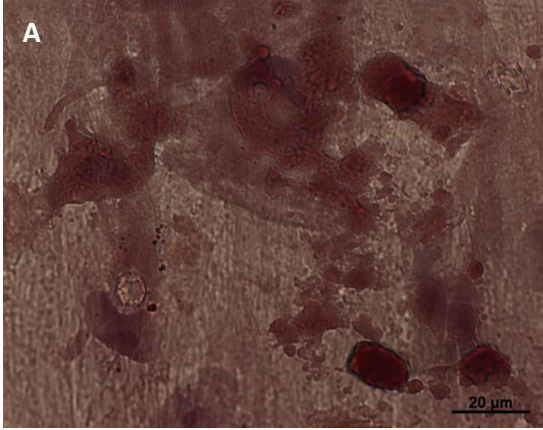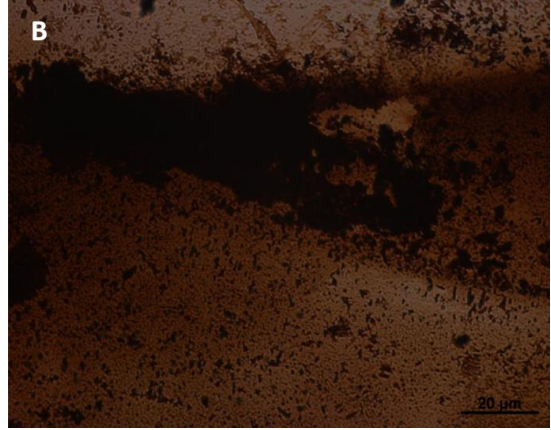

Supplement: pone.0120137.s004.pdf [file pone.0120137.s004.pdf]
